CORRECTION

## Correction: Low-dimensional controllability of brain networks

Remy Ben Messaoud, Vincent Le Du, Camile Bousfiha, Marie-Constance Corsi, Juliana Gonzalez-Astudillo, Brigitte Charlotte Kaufmann, Tristan Venot, Baptiste Couvy-Duchesne, Raffaella Migliaccio, Charlotte Rosso, Paolo Bartolomeo, Mario Chavez, Fabrizio De Vico Fallani

### Notice of republication

This article was republished on September 25, 2025, to correct errors the ninth author's name. The correct name is: Raffaella Migliaccio. The originally published, uncorrected article and the republished, corrected articles are provided here for reference.

### Supporting information

**S1 File. Originally published, uncorrected article.**  
(PDF)

**S2 File. Republished, corrected article.**  
(PDF)

### Reference

1. Ben Messaoud R, Le Du V, Bousfiha C, Corsi M-C, Gonzalez-Astudillo J, Kaufmann BC, et al. Low-dimensional controllability of brain networks. *PLoS Comput Biol.* 2025;21(1):e1012691. <https://doi.org/10.1371/journal.pcbi.1012691> PMID: [39775065](https://pubmed.ncbi.nlm.nih.gov/39775065/)

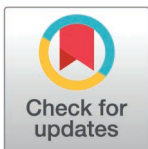

### OPEN ACCESS

**Citation:** Ben Messaoud R, Le Du V, Bousfiha C, Corsi M-C, Gonzalez-Astudillo J, Kaufmann BC, et al. (2025) Correction: Low-dimensional controllability of brain networks. *PLoS Comput Biol* 21(10): e1013601. <https://doi.org/10.1371/journal.pcbi.1013601>

**Published:** October 21, 2025

**Copyright:** © 2025 Ben Messaoud et al. This is an open access article distributed under the terms of the [Creative Commons Attribution License](https://creativecommons.org/licenses/by/4.0/), which permits unrestricted use, distribution, and reproduction in any medium, provided the original author and source are credited.
